# Supplementary material
Source: PubMed Central journal article supplement (PMC3622358)

Hanson, S, SupMat, FigureS3 Inventory and Phylogenomic Analysis of Meiotic Genes in Monogonont Rotifers. JHered.

**A**

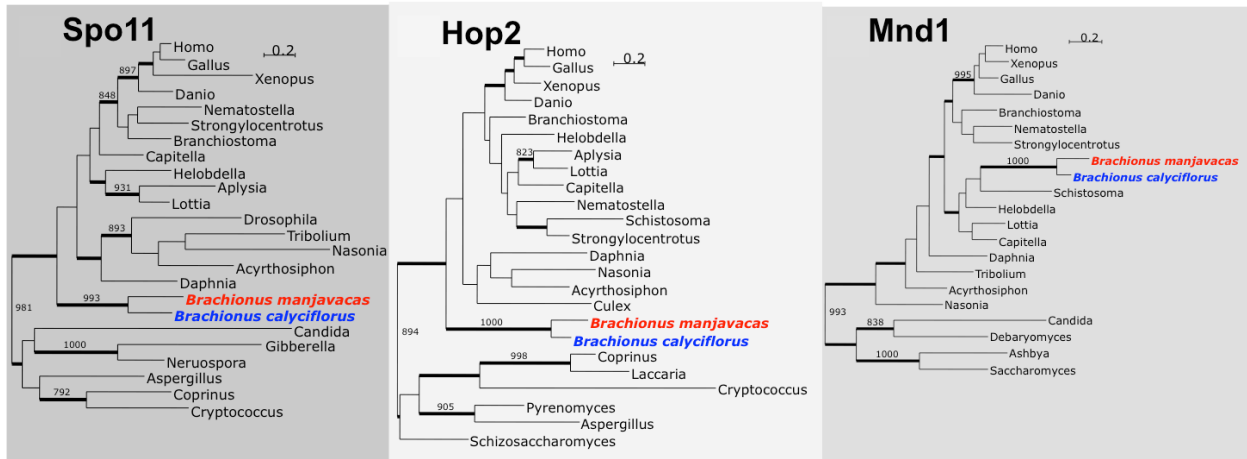

**B**

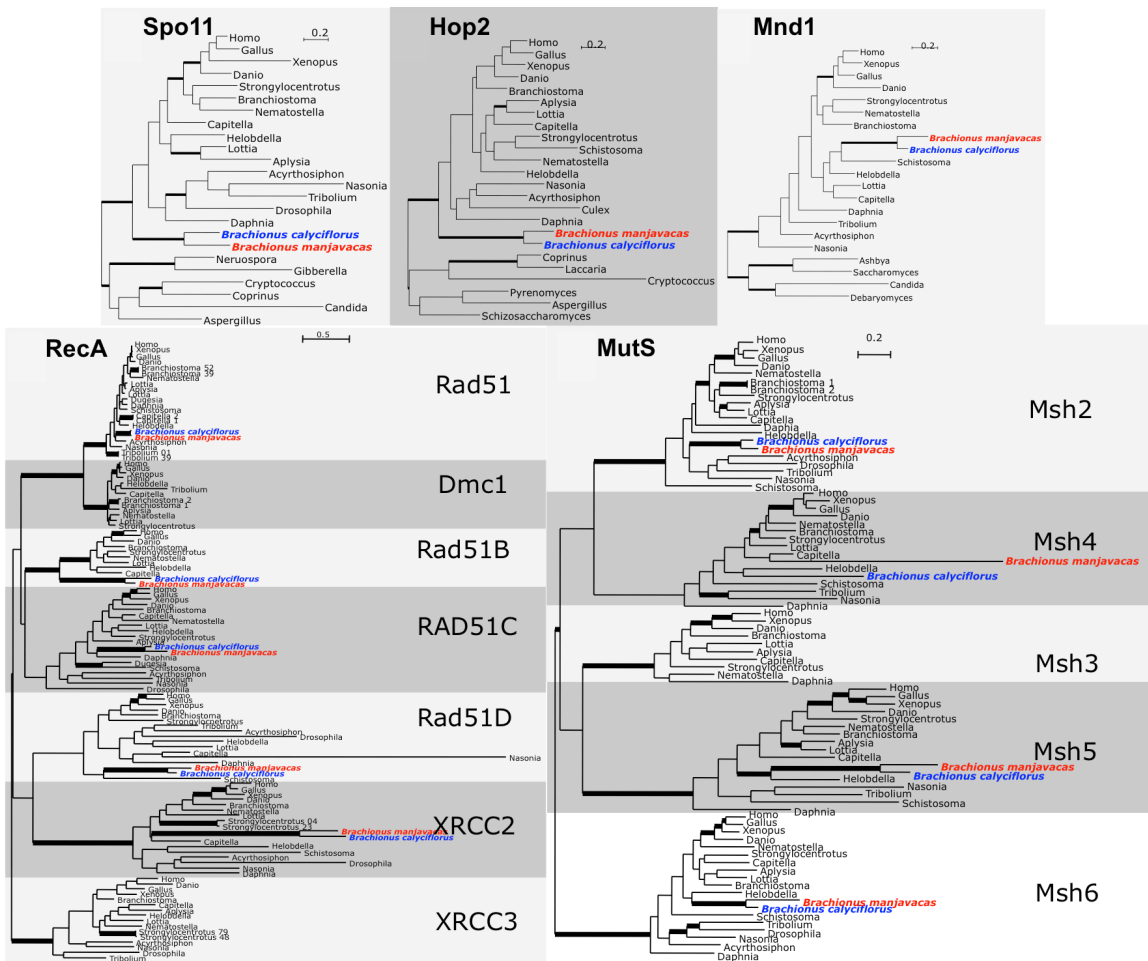

**C**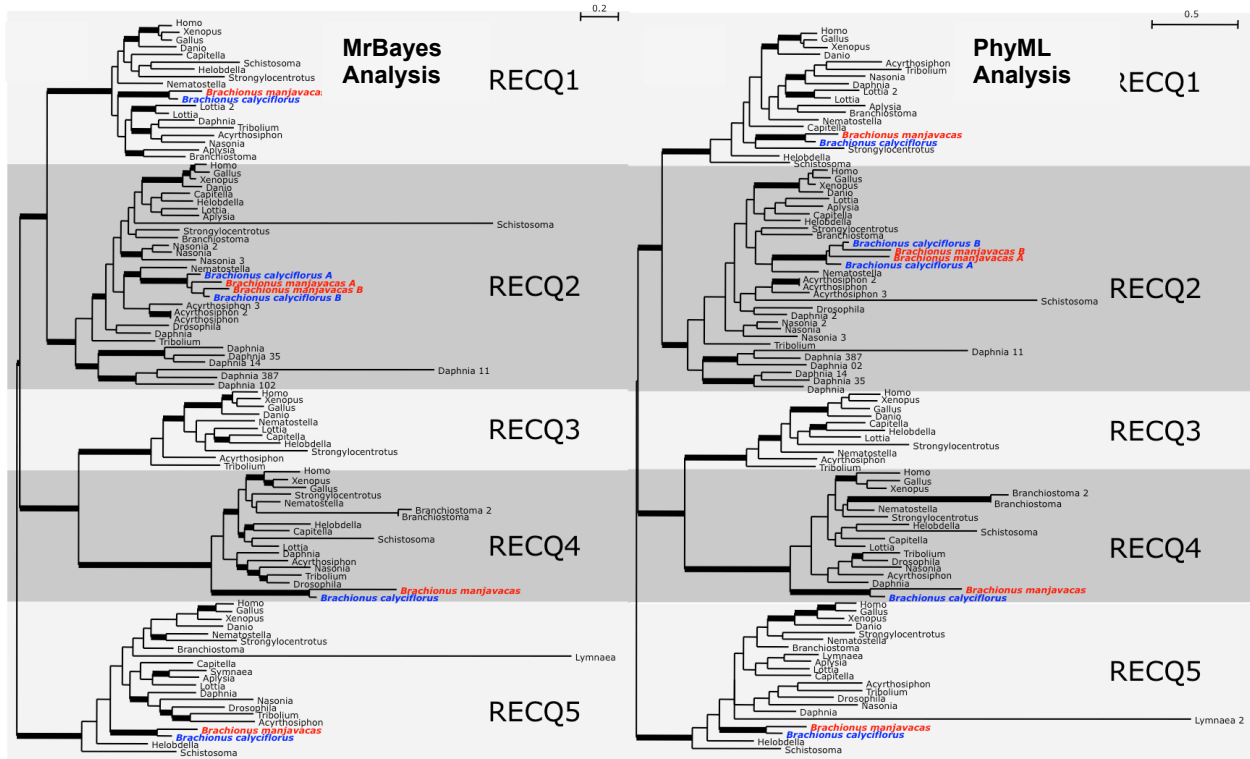**D**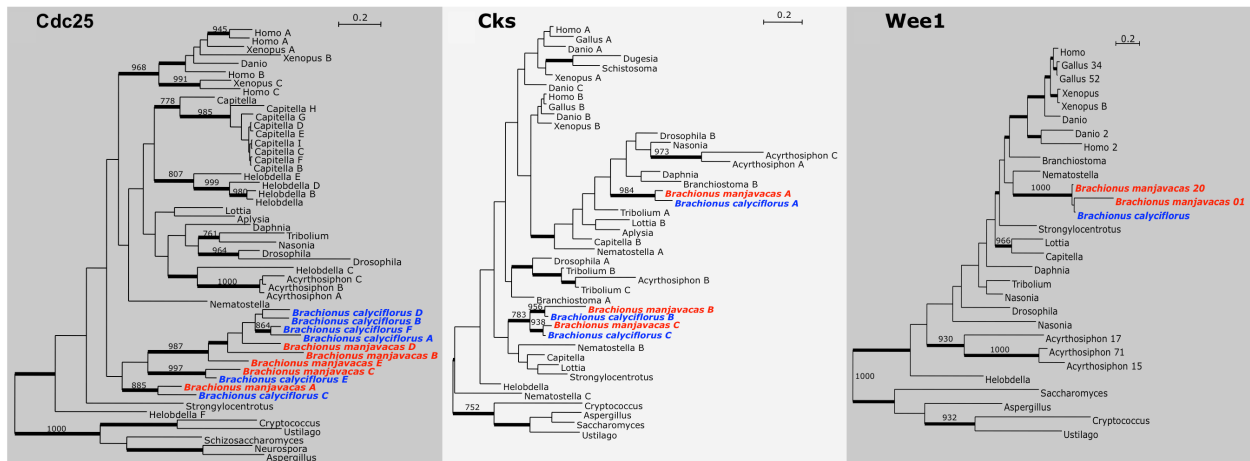

Supplement: supp_est011_Hanson_S__SupMat__FigureS2.pdf [file supp_est011_Hanson_S__SupMat__FigureS2.pdf]
