# Supplementary material
Source: PubMed Central journal article supplement (PMC3622358)

Hanson, S,\_SupMat,\_FigureS4 Inventory and Phylogenomic Analysis of Meiotic Genes in Monogonont Rotifers. JHered.

**A**

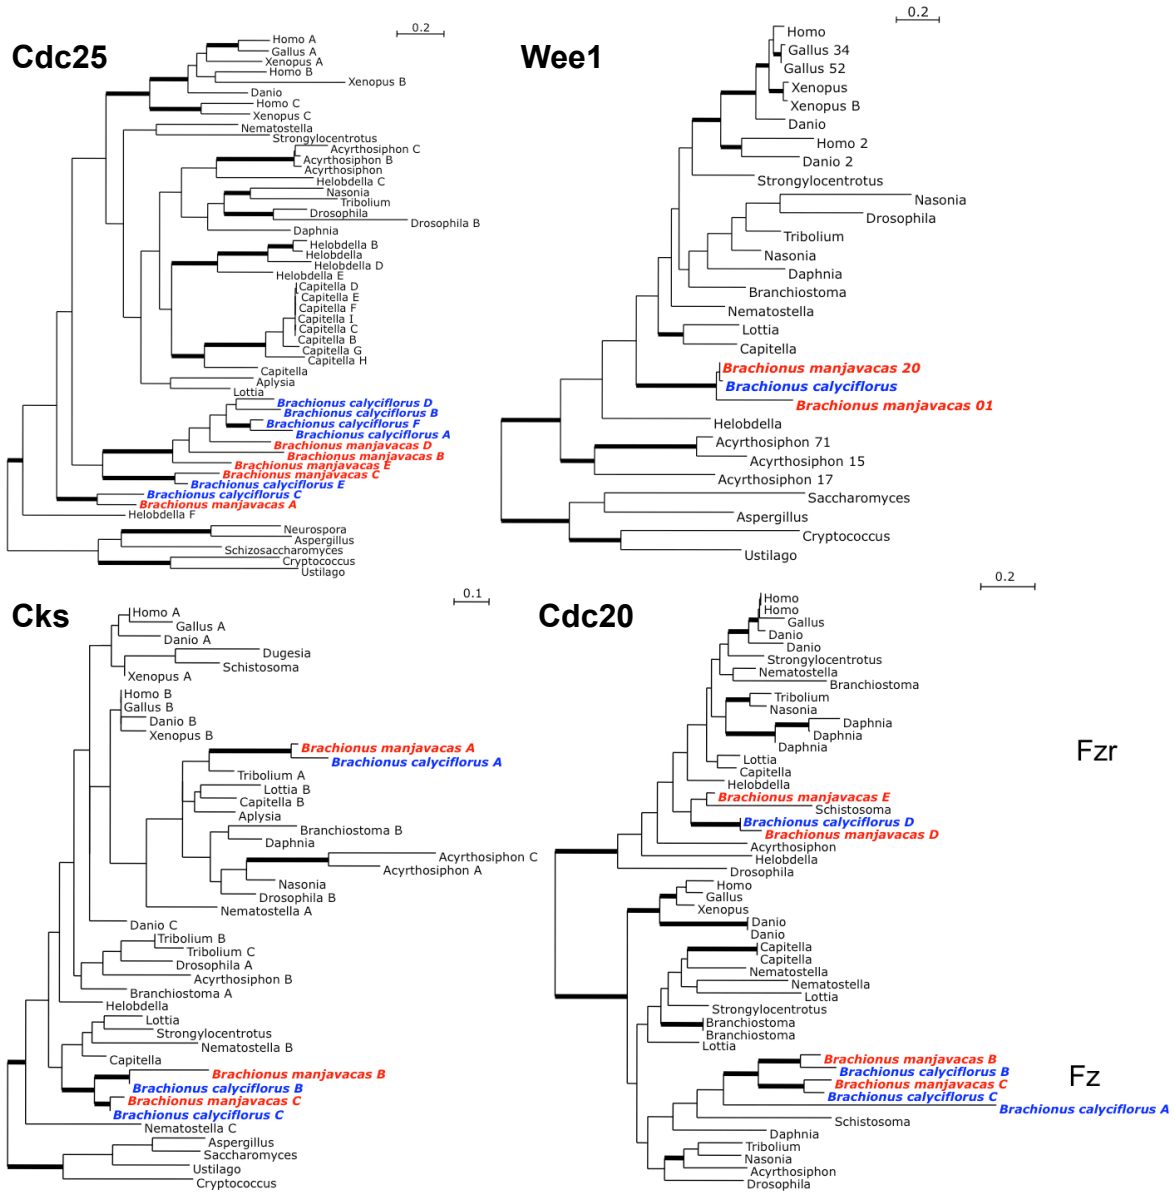

**B**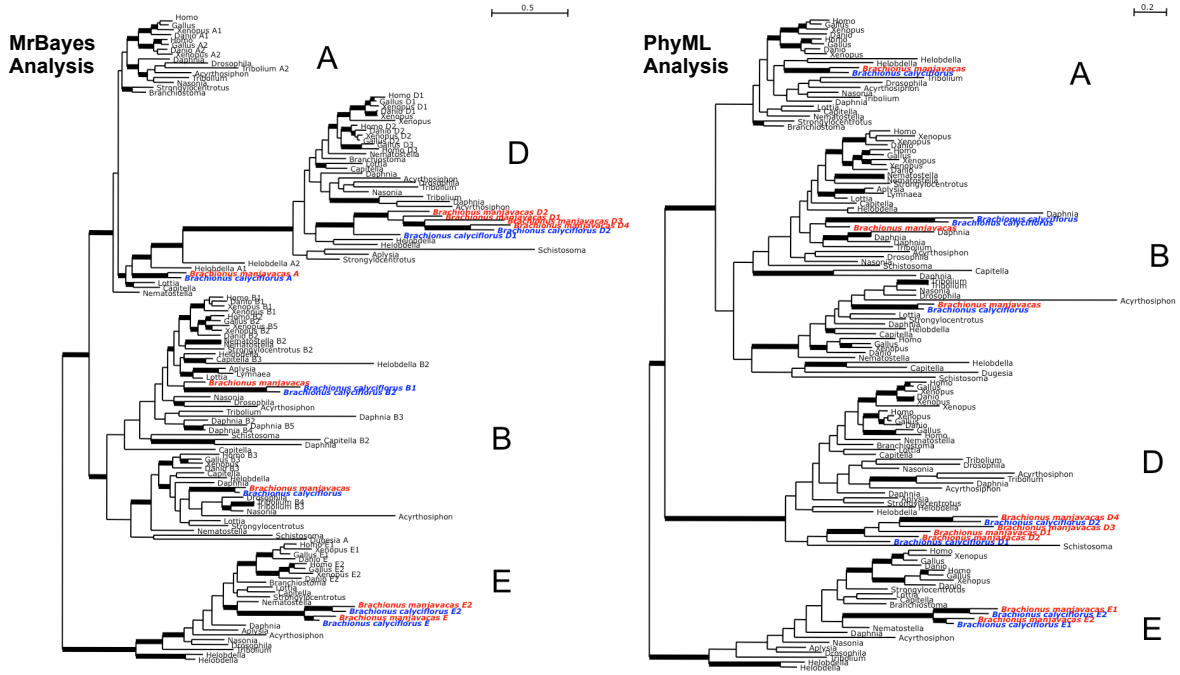**C**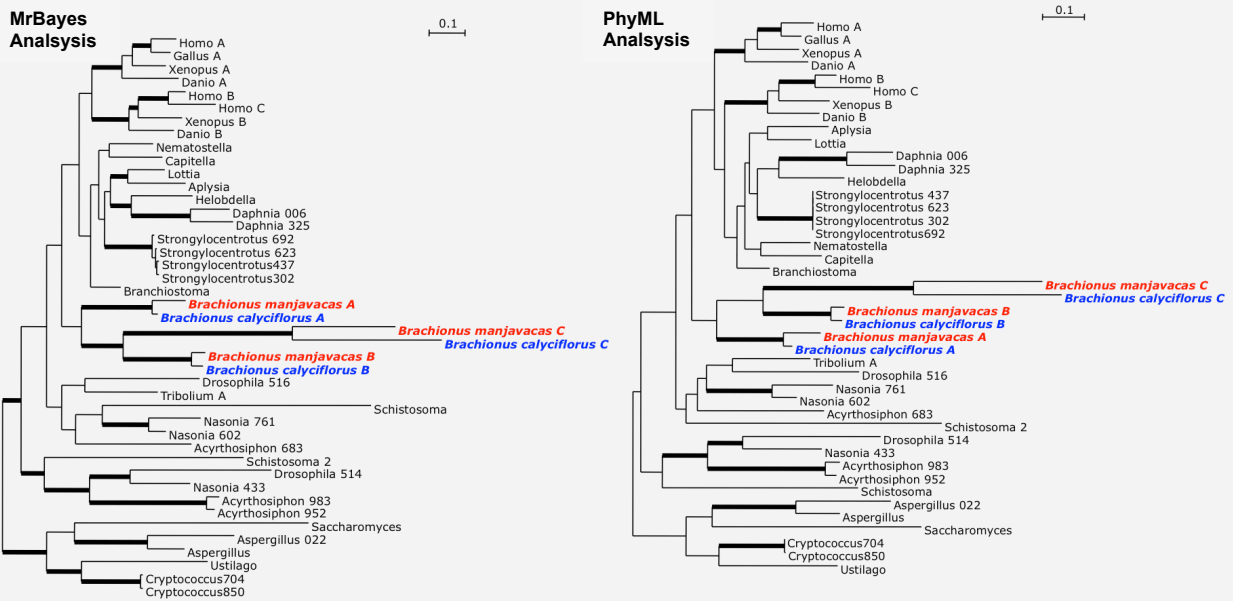

Supplement: supp_est011_Hanson_S__SupMat__FigureS3.pdf [file supp_est011_Hanson_S__SupMat__FigureS3.pdf]
