# Supplementary material
Source: PubMed Central journal article supplement (PMC3622358)

**A**

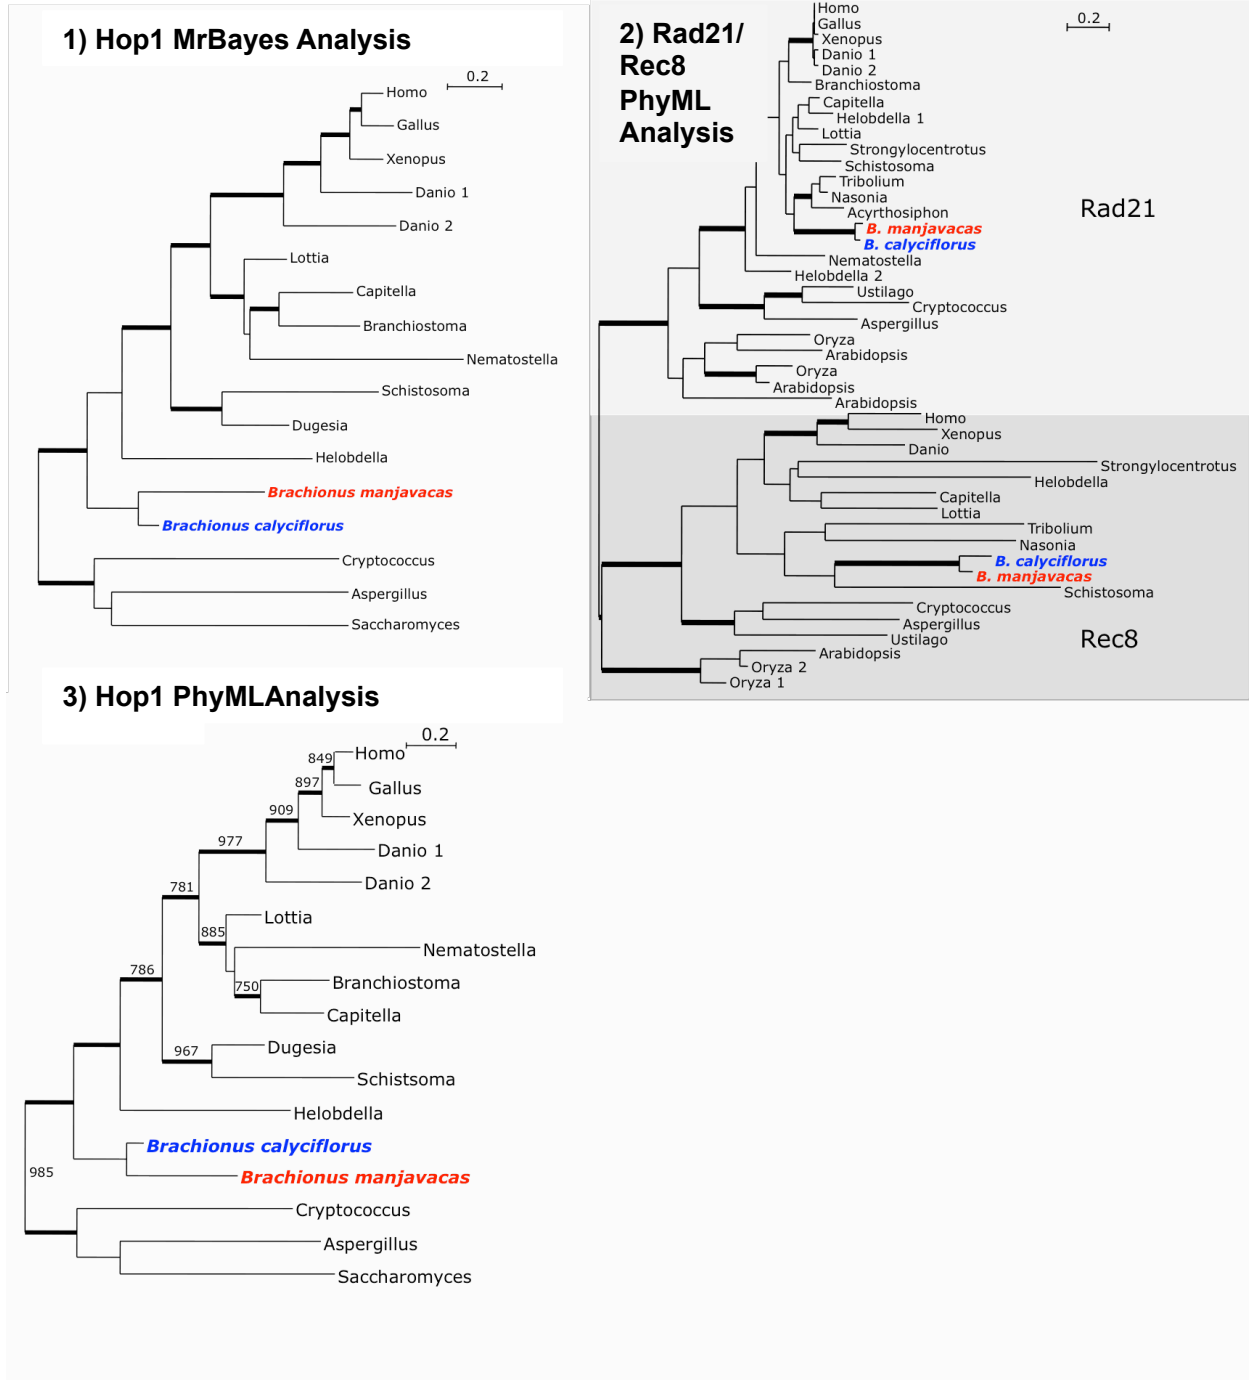

**B**

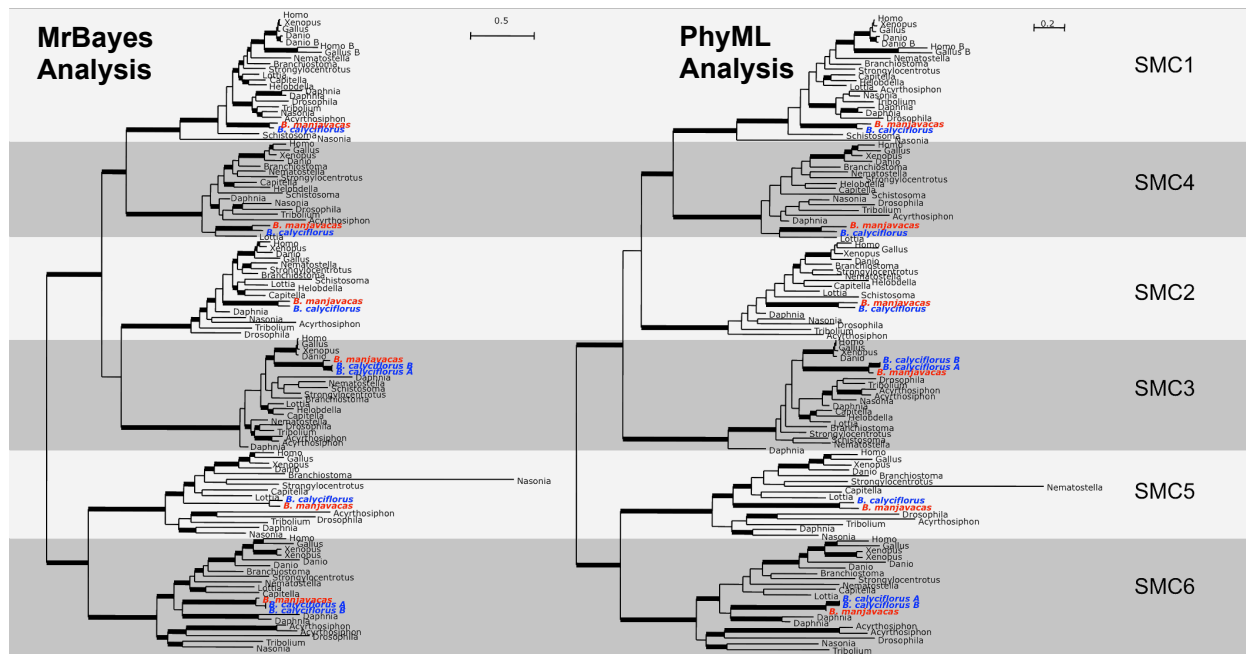

**C**

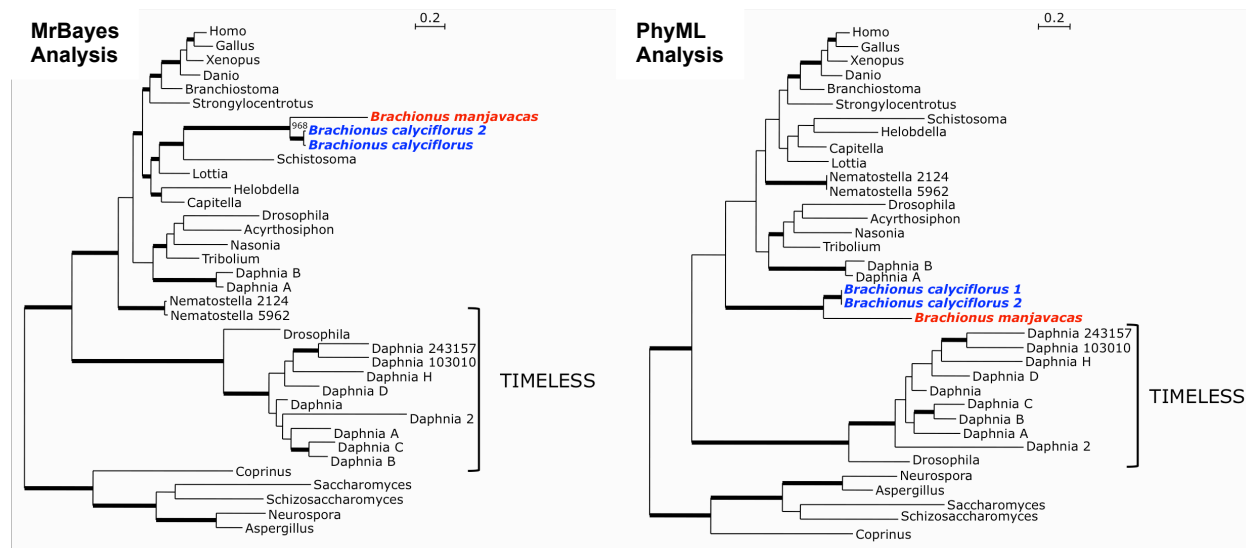

Supplement: supp_est011_Hanson_S__SupMat__FigureS1.pdf [file supp_est011_Hanson_S__SupMat__FigureS1.pdf]
